# Supplementary material for: Prognostic values of pretreatment neutrophil-to-lymphocyte and platelet-to-lymphocyte ratios in endometrial cancer: a systematic review and meta-analysis
Source: PubMed Central journal article supplement (PMC7028808; doi:10.1007/s00404-019-05372-w), 2019-11-25
Supplement: 404_2019_5372_MOESM1_ESM.pdf [file 404_2019_5372_MOESM1_ESM.pdf]

**Journal name:** Archives of Gynecology and Obstetrics

**Article title:** Prognostic values of pretreatment neutrophil-to-lymphocyte and platelet-to-lymphocyte ratios in endometrial cancer: a systematic review and meta-analysis

**Author names:** Liwei Ni\*, Jialong Tao\*, Jianhao Xu, Xuya Yuan, Yuming Long, Na Yu, Runhong Wu, Yusong Zhang#

**Affiliation:** Department of Oncology, The Second Affiliated Hospital of Soochow University, Suzhou,

Jiangsu 215004, P.R. China

### Corresponding Authors

#Yusong Zhang, e-mail: zhangyusong19@163.com.

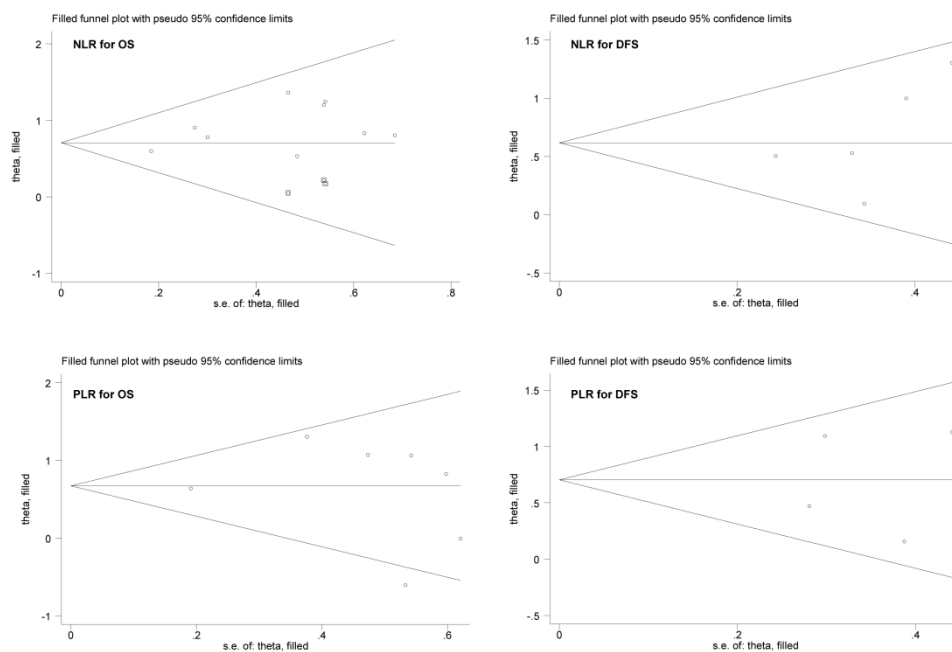

**Fig. S1** Metatrim test of studies included in meta-analysis of NLR for OS (new pHR = 2.029, 95%CI = 1.642–2.508), NLR for DFS (new pHR = 1.805, 95%CI = 1.353–2.408), PLR for OS (new pHR = 1.987, 95%CI = 1.511–2.613), and PLR for DFS (new pHR = 2.017, 95%CI = 1.453- 2.799)

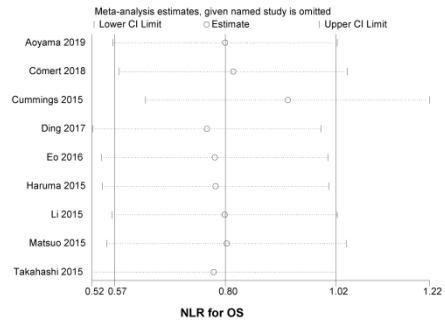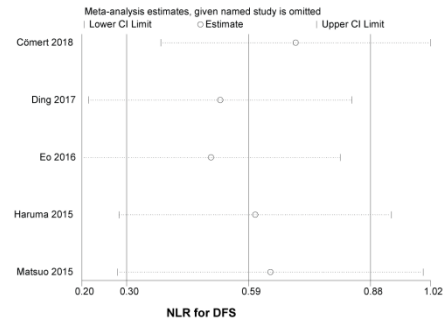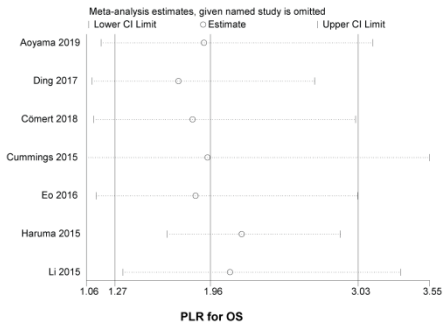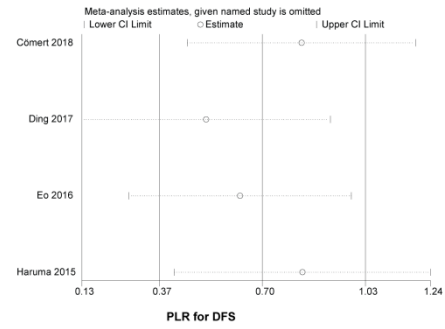

**Fig. S2** Metaninf test of studies included in meta-analysis of NLR for OS, NLR for DFS, PLR for OS, and NLR for DFS
